# Functional analysis in a model sea anemone reveals phylogenetic complexity and a role in cnidocyte discharge of DEG/ENaC ion channels

**Short title:** Functional analysis of DEG/ENaCs in *Nematostella*

**Jose Maria Aguilar-Camacho<sup>1†‡</sup>, Katharina Foreman<sup>2†</sup>, Reuven Aharoni<sup>1</sup>, Stefan Gründer<sup>2\*</sup> & Yehu Moran<sup>1\*</sup>**

<sup>1</sup>Department of Ecology, Evolution and Behavior, Alexander Silberman Institute of Life Sciences, Faculty of Science, The Hebrew University of Jerusalem, Jerusalem, Israel.

<sup>2</sup>Institute of Physiology, RWTH Aachen University, Aachen, Germany.

<sup>†</sup>These authors contributed equally to this work. <sup>‡</sup>Present address: Department of Biological Sciences, North Carolina State University, Raleigh, North Carolina. \*Corresponding authors: Stefan Gründer ([sgruender@ukaachen.de](mailto:sgruender@ukaachen.de)), Yehu Moran ([yehu.moran@mail.huji.ac.il](mailto:yehu.moran@mail.huji.ac.il)).

## Abstract

**Ion channels of the DEG/ENaC family share a similar structure but serve strikingly diverse biological functions, such as Na<sup>+</sup> reabsorption, mechanosensing, proton-sensing, chemosensing and cell-cell communication via neuropeptides. This functional diversity raises the question of the ancient function of DEG/ENaCs. Using an extensive phylogenetic analysis across many different animal groups, we found a surprising diversity of DEG/ENaCs already in Cnidaria (corals, sea anemones, hydroids and jellyfish). Using a combination of gene expression analysis, electrophysiological and functional studies combined with pharmacological inhibition as well as genetic knockout in the model cnidarian *Nematostella vectensis*, we reveal an unanticipated role for a proton-sensitive DEG/ENaC in discharge of *N. vectensis* cnidocytes, the stinging cells typifying all cnidarians. Our study supports the view that DEG/ENaCs are versatile channels that have been co-opted for diverse functions since their early occurrence in animals and that respond to simple and ancient stimuli, such as omnipresent protons.**

## Teaser

The analysis of an ion channel class in a sea anemone reveals its role in acidity-induced discharge of stinging cells.

## INTRODUCTION

Members of the degenerin/epithelial Na<sup>+</sup> channel (DEG/ENaC) superfamily share a similar structure with two transmembrane domains (TMDs), a large extracellular domain (ECD), and cytosolic amino- and carboxy-termini (1). A functional DEG/ENaC ion channel is a complex of three subunits (1, 2). Despite these common structural features and their common ancestry, and in striking contrast to many other ion channel families, members of the DEG/ENaC superfamily are highly diverse in function and activation mechanisms, both in a given phylum and between phyla (3, 4).

In mammals, there are typically nine different genes coding for DEG/ENaCs, which include the epithelial Na<sup>+</sup> channels (ENaCs), acid-sensing ion channels (ASICs) and the bile acid-sensitive ion channel (BASIC) (5). ENaCs are constitutively open channels that contribute to whole body Na<sup>+</sup> homeostasis (6). ASICs are gated by extracellular protons and modulated by extracellular Ca<sup>2+</sup> ions and/or neuropeptides (7, 8). They are expressed in the central and peripheral nervous system where they act as proton sensors (8, 9). BASIC is gated by bile acids and blocked by extracellular Ca<sup>2+</sup> ions (10). It is found in the epithelial cells of the bile ducts, but its physiological function remains uncertain (11). While ENaC evolved early in vertebrates and might have aided in the osmoregulatory adaption during

the transition of vertebrates to land (12), proton-sensitive ASICs are also present in non-vertebrate deuterostomes and some protostomes and likely evolved before the Cambrian explosion (13, 14). Therefore, it has been proposed that ENaC evolved from the ASIC lineage (12, 13).

In insects, a large family of DEG/ENaCs called Pickpockets (PPKs) was studied mostly in the fly *Drosophila melanogaster* that carries 31 genes of this family (15). They are expressed in glia and selected neuronal subpopulations, responding to mechanical, thermal, and chemical stimuli (16), and mediating diverse functions such as locomotion (17) and salt and water taste (16, 18, 19). The nematode *Caenorhabditis elegans* has 30 DEG/ENaC genes called *degenerins*, some of which are found in touch receptor neurons where they are gated by touch stimuli (20, 21). In snails, a DEG/ENaC expressed in neurons is called FaNaC and is directly gated by the neuropeptide FMRFamide (22). In the marine annelid *Platynereis dumerilii*, many DEG/ENaCs were identified, and one of them, called MGIC, is broadly expressed in the larval brain and is gated by a group of related neuropeptides, the Wamides (23).

The phylum Cnidaria, which includes sea anemones, corals, jellyfish and hydroids, is a sister group to Bilateria and represents a relatively basal branch within Metazoa. It can be further divided in two subphyla: Anthozoa (sea anemones and corals) and Medusozoa (jellyfish and hydroids) (24). Twelve DEG/ENaCs were identified in the hydroid freshwater polyp *Hydra magnipapillata* (subphylum Medusozoa), the HyNaCs. HyNaCs assemble into a variety of heterotrimers that are uniformly gated by just two *Hydra* neuropeptides, Hydra-RFamide 1 and Hydra-RFamide 2 (25, 26); the only exception is HyNaC12, for which the activating stimulus is unknown (26). HyNaCs are differentially expressed in the peduncle and at the base of the tentacles, potentially playing a role in muscle contraction and feeding behavior (26-28).

Finally, while DEG/ENaCs are absent from unicellular eukaryotes, they are also present in all other groups of basal animals: sponges, ctenophores (29) and the placozoan *Trichoplax adhaerens* (30), demonstrating that DEG/ENaCs emerged at the base of the animal tree of life. In *T. adhaerens*, eleven genes were discovered, called TadNaCs. One of them is constitutively open, modulated by alkaline pH and blocked by external  $H^+$  and  $Ca^{2+}$  ions (30).

In summary, DEG/ENaCs have very diverse activation stimuli and their variety in different animal groups is striking. This raises the question of the ancient properties of DEG/ENaCs. Because apparently all DEG/ENaCs of *Hydra* are activated by neuropeptides and because this feature is shared with DEG/ENaCs from different protostome species, it has been proposed that DEG/ENaCs evolved from a peptide-gated channel (26). However, it cannot be excluded that *Hydra* lost genes for other ancestral DEG/ENaCs with different gating mechanisms.

To further resolve the open questions of the evolution of DEG/ENaCs, we turned to the sea anemone *Nematostella vectensis*, a member of the cnidarian subphylum Anthozoa, which branched from the Medusozoan subphylum >500 million years ago (31). We identified 29 DEG/ENaCs, which we named *Nematostella* Sodium Channels (NeNaCs). The sequences of NeNaCs are surprisingly

diverse, suggesting a complex ancient set of DEG/ENaCs. Employing molecular, genetic and electrophysiological methods, we characterized one NeNaC in detail, revealing a proton-sensitive DEG/ENaC that mediates discharge of cnidocytes. Thus, our study reveals a complex evolution of the DEG/ENaC superfamily that is characterized by extensive phylum-specific gene losses and duplications. In addition, we identify an ion channel that mediates cnidocyte discharge by the omnipresent ligand protons.

## RESULTS

### Phylogenetic analysis reveals the ancient complexity of DEG/ENaCs

As a first step we searched for sequences encoding DEG/ENaCs in publicly available genomic and transcriptomic databases. Our analysis revealed that the DEG/ENaC superfamily greatly expanded and diversified in the phylum Cnidaria: many homologs were identified in the available genomes of different species belonging to the subphyla Anthozoa and Medusozoa: 29 genes in *N. vectensis* (NeNaCs), 16 in *Scolanthus callimorphus*, 21 in *Pocillipora damicornis*, 19 in *Actinia tenebrosa*, 14 in *Amplexidiscus fenestrafer*, 26 in *Stylophora pistillata*, 37 in *Clytia hemisphaerica*, 11 in *H. magnipapillata* (HyNaCs) and 18 in *Aurelia aurita* (fig. S1). In addition, we retrieved DEG/ENaCs from the marine sponge *Amphimedon queenslandica*, and molecular phylogeny revealed that they are monophyletic and members of a clade that is separated from DEG/ENaCs of all other species (sister clade) (Fig. 1A and fig. S1) and hence we placed them as an outgroup (Fig. 1A and B). From this analysis, two major molecular clades were discovered, which both contain cnidarian DEG/ENaCs: Clade A contains in addition deuterostome ASICs, vertebrate BASIC, all PPKs, some degenerins, and most TadNaCs, and Clade B contains in addition human ENaCs, FaNaCs, ENaCs from annelids, additional degenerins, and one TadNaC.

The sequences of Cnidaria are polyphyletic and dispersed in six different molecular subclades within the two major clades: subclades I, II, III and IV in clade A; subclades V and VI in clade B. Subclade I contains a monophyletic branch with members of Anthozoa (i.e., NeNaC2) and this subclade is part of a monophyletic subclade with BASIC and ASICs from deuterostomes, two Degenerins (Del9 and Del10), most TadNaCs, and some additional sequences of Anthozoa (i.e., NeNaC23 and *A. tenebrosa* 7) (fig. S1). Subclade II contains only sequences from Cnidaria (Anthozoa and Medusozoa, for example HyNaCs, NeNaC1 and NeNaC24). Subclade III also contains only sequences of Anthozoa (i.e., NeNaC6, NeNaC9) with the striking exception of one sequence of *D. melanogaster*, PPK17, the sole member of a subfamily of PPKs (15). Sequences of Ctenophora are monophyletic and a sister clade to subclades I-III. Subclade IV contains some sequences of Medusozoa (only of *C. haemisphaerica*) and this is a sister clade to most PPKs and some degenerins (i.e. ACD-1, ACD-5). Subclade V of clade B contains only cnidarian DEG/ENaCs, mostly of Anthozoa, although two sequences of Medusozoa (HyNaC12 and *Clytia haemisphaerica*10) are within this subclade. Subclade V is part of a monophyletic

subclade containing human ENaCs, one TadNaC (TadNaC10), additional Degenerins (i.e. DEL-1, MEC-4, MEC-10), FaNaCs and ENaCs from Annelida (for example peptide-gated MGIC) and two additional NeNaCs (NeNaC16 and NeNaC17). It is a sister clade to subclade VI containing sequences of Medusozoa (excluding HyNaCs).

### **Spatiotemporal expression patterns of DEG/ENaCs of *N. vectensis***

We uncovered the expression patterns of 20 NeNaCs (out of 29) at three different developmental stages, early planula (3 days post-fertilization, dpf), metamorphic phase (5 dpf) and primary polyp (9 dpf) using in situ hybridization (ISH) (Fig. 2). No expression was detected for any of the NeNaCs in the gastrula stage (1 dpf). Three NeNaCs showed a unique expression pattern at their three developmental stages: NeNaC1, NeNaC2, and NeNaC3. NeNaC1 is expressed in endodermal cells and a few ectodermal cells in the oral end in the planula and metamorphic phase. In the primary polyp, the expression is mostly in endodermal cells of the tentacles and pharynx. These cells could be tentacular neurons as in previously published single cell RNA sequencing (scRNA-seq) data this gene was upregulated in a “metacell” of neurons (32) (Fig. 2; Fig. S2A and B). NeNaC2 is expressed in ectodermal cells at the oral end in the planula and in the metamorphic phase; and in the primary polyp the expression is in ectodermal cells of the tentacles, a body region known to be rich in cnidocytes, the unique stinging cells of cnidarians. The identity of these cells as cnidocytes is further supported by scRNA-seq data that revealed upregulation of this gene in the “metacell” of cnidocytes (32) (Fig. 2; Fig. S2C and D).

NeNaC3 is expressed at the developing pharynx and at a domain of the aboral end in the planula. In the metamorphic phase, the expression is in endodermal and ectodermal cells in the developing pharynx and in the oral end. In the primary polyp, the expression is in endodermal cells in the pharynx and in ectodermal cells of the tentacles. For the vast majority of NeNaCs (e.g., NeNaC6, NeNaC7, NeNaC24), the expression pattern is in endodermal cells of the developing pharynx in the planula and in the metamorphic phase. In the primary polyp, the expression is in endodermal cells of the pharynx. NeNaC8 and NeNaC10 are expressed in endodermal cells of the tentacles and pharynx in the primary polyp. NeNaC21, NeNaC22 and NeNaC25 are expressed in endodermal cells of the tentacles in the primary polyp and NeNaC15 is expressed in endodermal cells of the mesenteries in the primary polyp (Fig. 2).

### **Some NeNaCs form functional homomers in *Xenopus* oocytes**

We selected 15 NeNaCs with a clear expression in ISH for functional analysis (NeNaC1-NeNaC3, NeNaC5-NeNaC12, NeNaC14, NeNaC15, NeNaC23 and NeNaC24). The length of these 15 NeNaCs varied from 458 to 578 amino acids (Fig. S3). Typical hallmarks of DEG/ENaCs were completely conserved (Fig. S3): two putative TMDs with a HG motif proximal of TMD1, a Trp residue at the beginning of TMD1, 11-14 conserved Cys residues in the ECD, and a GxS motif in TMD2, which is

crucial for ion selectivity (33, 34). The conservation of these hallmarks suggests that NeNaCs form functional cation channels.

To functionally characterize these 15 NeNaCs, we expressed them in *Xenopus laevis* oocytes and performed two-electrode voltage clamp (TEVC). We started by co-injecting up to nine different NeNaCs that belong to the same clade (A or B); subsequently, we injected increasingly smaller groups and different combinations until we injected single NeNaCs. Based on the known properties of DEG/ENaCs from other species, we tested for proton-sensitivity by applying an acidic bath solution (pH 4.0) and for constitutively active channels by applying the pore blockers amiloride (100  $\mu$ M) or diminazene (10  $\mu$ M). In addition, we tried to unspecifically activate NeNaCs by applying a bath solution with a low concentration of divalent cations (10  $\mu$ M  $\text{Ca}^{2+}$ , no  $\text{Mg}^{2+}$ ). Not all stimuli were applied to all NeNaCs (table S1). This analysis revealed that NeNaC2 and NeNaC14 were sensitive to protons and that NeNaC8-expressing oocytes had small constitutive currents that were sensitive to amiloride (100  $\mu$ M) and diminazene (10  $\mu$ M). In addition, in oocytes that expressed NeNaC8, reducing  $[\text{Ca}^{2+}]$  in the bath solution elicited large currents. These results suggest that these three NeNaCs form functional homomeric channels in *Xenopus* oocytes.

To obtain further information on these NeNaCs, we mutated the degenerin (DEG) position, which is just proximal to TMD2. NeNaCs have amino acids with a small side chain at this position (Gly, Ala or Ser; Fig. S3). Introducing an amino acid with a large side chain, such as threonine (Thr) constitutively opens some DEG/ENaCs, allowing to detect channel activity in the absence of a physiological ligand. We again co-injected up to ten different NeNaCs with the DEG mutation (DEG-NeNaCs) that belong to the same clade and then injected increasingly smaller groups until we injected single DEG-NeNaCs. We applied the same stimuli as for WT channels (pH 4.0, amiloride, diminazene, low divalent cations). Although we did not comprehensively test all possible combinations, large constitutive currents (up to approximately 15  $\mu$ A), which were sensitive to amiloride and diminazene, were observed whenever a pool contained either NeNaC1-G495T or NeNaC2-G516T from clade A, or NeNaC8-G423T, NeNaC14-G471T or NeNaC15-G460T from clade B (table S1). These channels also gave rise to constitutive currents when injected alone and, in addition, were also sensitive to protons (Fig. S4). NeNaC3-S464T was not constitutively active, but protons (pH 5 and pH 6.0) elicited small currents (up to 1  $\mu$ A). These findings confirm that NeNaC2, NeNaC8, and NeNaC14 form homomeric channels in oocytes. In addition, they reveal that NeNaC1, NeNaC3 and NeNaC15 form homomeric channels too. In summary, we obtained evidence that six NeNaCs can form homomeric channels in *Xenopus* oocytes. From our analysis of oocytes co-expressing more than one NeNaC or DEG-NeNaC, we obtained no evidence for specific heteromeric channels. Nevertheless, a more systematic analysis is required to clearly reveal the formation of heteromeric NeNaCs.

To test for a peptide-gated ion channel among those NeNaCs, we applied 27 different *Nematostella* neuropeptides (1 - 30  $\mu$ M; table S2) (35-37). However, none of these peptides elicited currents in oocytes expressing different combinations of NeNaCs or individual NeNaCs (table S2).



## NeNaC2 is a proton-sensitive Na<sup>+</sup> channel

We analyzed the functional properties of proton-sensitive NeNaC2 and NeNaC14 and of constitutively active NeNaC8 in more detail. Proton-sensitivity of NeNaC2 was determined by applying increasingly more acidic pH levels ranging from pH 7.0 to pH 4.0, revealing half-maximal activation at  $\text{pH } 5.8 \pm 0.7$  ( $n = 9$ ; Fig. 3A). Current amplitude saturated at about pH 5.5 and up to this pH, currents showed no strong desensitization. At pH values below pH 5.5, however, currents became biphasic, with a brief transient component followed by a sustained component. The current amplitude of the sustained component successively decreased at more acidic pH (Fig. 3A).

HyNaCs have a high Ca<sup>2+</sup> permeability (28), leading to biphasic current in oocytes: the transient part due to secondary activation of Ca<sup>2+</sup>-activated Cl<sup>-</sup> Channels (CaCCs), which are endogenous to *Xenopus laevis* oocytes, and the sustained part due to influx via HyNaCs. To test whether the biphasic NeNaC2 currents were due to Ca<sup>2+</sup> permeability and activation of the endogenous CaCC, we injected NeNaC2 expressing oocytes with the Ca<sup>2+</sup> chelator EGTA to prevent Ca<sup>2+</sup> from activating the CaCC. However, EGTA injection did not abolish the biphasic current (Fig. 3B). Thus, it appears that NeNaC2 does not conduct substantial amounts of Ca<sup>2+</sup> and that it only desensitizes at strong acidic pulses, but not at more physiological pH values, where it carries simple on-off currents. We assessed ion selectivity of NeNaC2 more systematically and determined the reversal potential  $E_{rev}$  with Na<sup>+</sup>, K<sup>+</sup> and Ca<sup>2+</sup> as the main extracellular cation (Fig. 3C). This revealed a  $P_{Na}/P_K = 5.5$  and  $P_{Na}/P_{Ca} = 0.7$ . In summary, NeNaC2 is a moderately selective Na<sup>+</sup> channel.

Next, we determined sensitivity of NeNaC2 to amiloride and diminazene at pH 6.0. Amiloride inhibited NeNaC2 with a low apparent IC<sub>50</sub> of  $1.3 \pm 2.3$  mM ( $n = 10$ ; Fig 3D); even at high amiloride concentrations, the inhibition was incomplete. Diminazene, in contrast, had a higher potency with an apparent IC<sub>50</sub> of  $2.4 \pm 0.9$   $\mu$ M ( $n = 14$ ) and complete inhibition at high concentrations (Fig. 3D).

Previous work on ASICs revealed that a highly conserved histidine residue or a pair of histidine residues, just distal to TMD1 at the beginning of beta sheet 1 ( $\beta$ 1), are indispensable for proton-sensitivity of ASICs (13, 38-40). Sequence alignment of NeNaC2 with ASIC1a, ASIC2 and ASIC3 revealed that NeNaC2 has a histidine at position 141, two positions proximal of the critical histidine residue in ASICs (Fig 3E). While substitution of this histidine residue in NeNaC2 to alanine (H141A) reduced proton-evoked currents, it did not reduce apparent pH sensitivity ( $\text{pH}_{50} = 5.9 \pm 0.3$  for NeNaC2 wt and  $6.0 \pm 0.2$  for NeNaC2-H141A;  $p = 0.36$ ;  $n = 7-8$ ; Fig. 3E), demonstrating that H141 is dispensable for proton sensitivity of NeNaC2.

Proton-sensitivity of NeNaC14 was substantially lower than that of NeNaC2 with half-maximal activation at  $\text{pH } < 4.0$  ( $n = 11$ ; Fig. 4A). We therefore did not analyze the properties of NeNaC14 in more detail. We determined the current amplitude of NeNaC8-expressing oocytes with different concentrations of extracellular Ca<sup>2+</sup> (no Mg<sup>2+</sup>), revealing an apparent IC<sub>50</sub> for Ca<sup>2+</sup> of  $20 \pm 30$   $\mu$ M ( $n = 15$ ; Fig. 4B). Thus, activity of NeNaC8 is tightly regulated by  $[\text{Ca}^{2+}]_e$ , similar to rat BASIC (41). We

determined apparent affinity of NeNaC8 to amiloride in a bath solution containing 100 nM  $\text{Ca}^{2+}$ , and apparent affinity to diminazene in a bath solution containing 1.8 mM or 100 nM  $\text{Ca}^{2+}$ . Apparent  $\text{IC}_{50}$  of amiloride was  $310 \pm 180 \mu\text{M}$  ( $n = 11$ ; Fig 4C) and apparent  $\text{IC}_{50}$  of diminazene  $124 \pm 75 \text{ nM}$  ( $n = 14$ ; 1.8 mM  $\text{Ca}^{2+}$ ) and  $250 \pm 230 \text{ nM}$  ( $n = 14$ ; 100 nM  $\text{Ca}^{2+}$ ; Fig. 4D), respectively, suggesting that diminazene does not compete with  $\text{Ca}^{2+}$ . At low concentrations, amiloride increased current amplitude (Fig. 4C).

### NeNaC2 mediates acid-induced cnidocyte discharge

Proton sensitivity of NeNaC2 to pH values in the physiological range was particularly intriguing. Therefore, and because NeNaC2 is expressed in cnidocytes (Fig. 2; Fig S2C and D), we tested whether NeNaC2 plays a functional role in cnidocytes. First, we assessed the capture of brine shrimp nauplii by three months old *Nematostella* polyps in the presence and absence of the NeNaC2 inhibitor diminazene. We found that diminazene (100  $\mu\text{M}$ ) delayed the capture in comparison to untreated polyps (Fig. 5A, B, C and D). We then assessed discharge of cnidocysts, the typifying explosive organelles found inside cnidocytes, at nearly neutral pH 7.2 and at acidic pH. In the presence of prey extract, cnidocysts were similarly discharged at pH 7.2 and at acidic pH (pH 6.0 or 5.5) (Fig. 5E-G and Fig. S5A and B). Moreover, diminazene did not affect the cnidocyst discharge induced by prey extract at pH 7.2 and pH 6.0, but at pH 5.5 it significantly reduced cnidocyst discharge (Fig. S5A and B). In the absence of prey extract, cnidocysts did not discharge at pH 7.2. However, as previously observed (42), acidic pH induced the discharge of the cnidocysts even in the absence of prey extract. Strikingly, this acid-induced cnidocyst discharge was completely abolished by diminazene (Fig. 5E-G and Fig. S5A and B) suggesting that NeNaC2 might mediate the acid-induced cnidocyte discharge. To gain further insight into the functional role of NeNaC2 in *Nematostella* we generated a null mutant for the gene encoding this channel. These NeNaC2 null homozygous mutants (NeNaC2<sup>(-/-)</sup>) had a deletion of 5 nucleotides (Fig. 5H), causing a frameshift at the amino acid level affecting the proper formation of a functional homomeric channel (table S3) as demonstrated by western blot with a specific NeNaC2 antibody (Fig. 5I). The prey capture experiment was carried out for the F2 progeny of NeNaC2, and no significant differences were detected in the pairwise comparisons between the three genetic pools (NeNaC2<sup>(+/+)</sup>, NeNaC2<sup>(+/-)</sup> and NeNaC2<sup>(-/-)</sup>) during the capture of the 1st, 2nd and 3rd artemia (fig. S6A and B). As described above, at acidic pH (6.0), NeNaC2<sup>(+/+)</sup> wild type polyps discharged cnidocysts in the absence of prey extract. NeNaC2<sup>(+/-)</sup> heterozygous and NeNaC2<sup>(-/-)</sup> null homozygous mutants, however, discharged a significantly reduced number of cnidocysts compared to NeNaC2<sup>(+/+)</sup> wild type organisms. This reduction in cnidocyst discharge was particularly pronounced for NeNaC2<sup>(-/-)</sup> null homozygous mutants (Fig. 5J and K). Together, these results provide compelling evidence that NeNaC2 mediates the acid-induced cnidocyte discharge.



## DISCUSSION

Our study has two major findings: it revealed that there is a greater diversification of the DEG/ENaC channels in Cnidaria than was previously recognized, and it uncovered a proton-sensitive DEG/ENaC in *N. vectensis* that is not directly related to ASICs and mediates acid-induced cnidocyte discharge.

### The ancient complexity of the DEG/ENaC gene family

The different paralog copies of selected cnidarian species cluster in six distinct subclades within the phylogenetic tree presented here (Fig. 1A). Most notably, cnidarian DEG/ENaCs are present in major clades A and B, highlighting that the common ancestor of cnidarian species already contained representatives from these two clades. *H. magnipapillata* has 12 DEG/ENaCs, which is a small number of genes compared to other marine and brackish cnidarian species (such as *N. vectensis*). Moreover, all HyNaCs cluster in subclade II of clade A, except for HyNaC12 which is in subclade V of clade B (Fig. 1A and B). Thus, the analysis of HyNaCs vastly underestimated the variety of Cnidarian DEG/ENaCs. Notably, even other hydrozoans such as *C. hemisphaerica* carry many more DEG/ENaCs (37 copies) which occupy more diverse positions on the phylogenetic tree (Fig. 1A). Thus, most likely the *Hydra* lineage lost many DEG/ENaCs that were present in the last common ancestor of all cnidarians and in the last common ancestor that *Hydra* shares with *Clytia*. This loss may be related to the freshwater habitat of *Hydra* because a similar situation is found in the phylum Porifera, where ion channels from different families (including DEG/ENaCs) are absent in freshwater species (Class: Demospongiae), based on the genome and transcriptome sequences, in comparison to selected marine sponge species (i.e., *A. queenslandica*) belonging to the same class where they are present (43, 44).

The 29 DEG/ENaCs of *N. vectensis* are distributed in almost all subclades, except for subclades IV and VI, which contain only DEG/ENaCs of medusozoans but not anthozoans. The closest relatives of ASICs and BASIC are NeNaC23 and NeNaC2; we found that NeNaC2 also senses protons but not NeNaC23 (see below). NeNaC1 and NeNaC24 are close relatives of peptide-gated HyNaCs, but we have not identified a peptide directly opening these two NeNaCs (see below). The diversification of NeNaCs in subclades III and V (Fig. 1A) is striking. Because subclade III contains no medusozoan DEG/ENaCs and subclade V only two (one of them is HyNaC12), we speculate that the diversification of anthozoan DEG/ENaCs in these two subclades serves anthozoan-specific functions.

Interestingly, DEG/ENaCs from the marine sponge *A. queenslandica* are sister to all other DEG/ENaCs (Fig. 1A). The position of animal phyla at the base of the animal tree of life is controversial. However, a relationship with sponges being a sister clade to all other metazoans would easily explain this finding by an ancestral DEG/ENaC from which DEG/ENaCs of sponges and non-sponge animals split and diverged. The next event in the evolution of DEG/ENaCs would have been the early split into clade A and clade B and the species-specific diversification within these two clades.

*Trichoplax*, Cnidaria and Bilateria all contain representatives of both clades (Fig. 1A), demonstrating that their evolution separated after this split. For ctenophores the situation is ambiguous. On the one hand, ctenophore DEG/ENaCs are monophyletic. On the other hand, our phylogenetic analysis suggests that they are sister clade to subclades I-III and evolved after the split of subclade IV from subclades I-III. This would imply that Ctenophora had the same set of DEG/ENaCs as Cnidaria but lost their clade B gene(s). Broader sampling of DEG/ENaCs from multiple ctenophore species might help to resolve this ambiguity.

The position of ASICs in clade A and mammalian ENaCs in clade B reveals their deep phylogenetic separation, excluding that ENaC evolved from the ASIC lineage as was suggested previously (12). It is remarkable that the stimuli, to which DEG/ENaCs respond, are either omnipresent, like protons, divalent cations, salt, and mechanical stimuli or are considered to be very ancient ligands, like neuropeptides (45). Collectively, the high variability of DEG/ENaCs in different species suggests that these versatile channels were repeatedly co-opted for the detection of different stimuli in different animals, contributing to their evolution and diversification.

### **A proton-sensitive NeNaC that mediates cnidocyte discharge**

We found that NeNaC2 is a proton-sensitive channel expressed in cnidocytes. The fact that the expression patterns of NeNaC2 according to ISH (Fig. 2) and scRNA-seq data (32) is not overlapping with other NeNaCs and that it is efficiently expressed in *Xenopus* oocytes as a homomer (Fig. 3), strongly suggests that NeNaC2 is also expressed as a homomer in cnidocytes. Previous studies have indicated that acidic pH induces cnidocyst discharge in *N. vectensis* (42), and we found that NeNaC2 has a role in this mechanism. Pharmacological blockade by diminazene abolished acid-induced cnidocyte discharge (Fig. 5F) and genetic knockout of NeNaC2 strongly reduced it (Fig. 5J, K). Further studies are required to understand the proton sources in *N. vectensis*, and the molecular components and ecological implications for the cnidocyst discharge at acidic pH.

Different ion channels (i.e.,  $\text{Ca}_v$ , TRP,  $\text{K}^+$  channels) are expressed in cnidocytes and are involved in cnidocyst discharge (46). These channels are triggered by chemo- and/or mechano- sensitive cues (e.g., prey extract), indicating that there is mechanistic redundancy in controlling discharge. Some of these channels such as the voltage-gated  $\text{Ca}^{2+}$  channels seem to be conserved in different cnidarian species (47-49), while others might be lineage specific innovations (50). In *H. magnipapillata* a cyclic nucleotide gated (CNG) channel in non-cnidocyte neurons regulates cnidocyst discharge by light (50). Thus, cnidocytes integrate mechanical and chemical cues into their discharge behavior. Our results show that protons are one of these environmental cues and that NeNaC2 is the sensor of it.

NeNaC2 is member of a monophyletic subclade containing ASICs from deuterostomes, TadNaCs, BASICS and other paralog copies of Anthozoa (but not Medusozoa) and the two degenerins Del-9 and Del-10. While ASICs are proton-sensitive (7, 27), BASIC is not (10). Among TadNaCs, only TadNaC6 has been investigated in detail and is a constitutively open channel which is modulated by alkaline pH;

it might be, though, that other TadNaCs are proton-sensitive (30). Activating stimuli of Del-9 and Del-10 are currently unknown. It is therefore tempting to conclude that the last common ancestor of Cnidaria, Placozoa and deuterostomes had a proton sensitive DEG/ENaC, which was at the base of this subclade, and that multiple duplication events occurred during the later evolution of these lineages, including independent gene losses in some protostomes and medusozoans. In this scenario, the gating mechanisms of BASIC and TadNaC6 would be derived or independent features. In an alternative scenario, proton-sensitivity of ASICs and NeNaC2 evolved independently from a proton-insensitive DEG/ENaC at the base of this subclade.

Recently, it has been reported that the *C. elegans* DEG/ENaCs ACD-5 and FLR-1 sense protons in the intestinal epithelium of *C. elegans*. ACD-5 shows maximal current at around pH 6.0 and is inhibited by both lower and higher pH; the FLR-1 containing channel is inhibited by acid (51), resembling TadNaC6 (30). ACD-1, which is expressed in *C. elegans* glia, is also inhibited by acid (52). ACD-1, ACD-5, and FLR-1 are closely related to each other and belong to a monophyletic clade that is sister to subclade VI (Fig. 1 and fig. S1). Belonging to the same clade is *Drosophila* PPK1, which is expressed in multidendritic sensory neurons, and has also been reported to sense acid (53). These channels are in relatively distant subclades from ASICs and NeNaCs within clade A (Fig. 1A). Moreover, their gating mechanisms seems to be different (activation vs inhibition by protons), suggesting that proton sensitivity evolved independently multiple times in this ion channel superfamily.

### Peptide-gated DEG/ENaCs

Previous studies characterized HyNaCs, which form heterotrimers gated by two *Hydra* RFamide neuropeptides (25, 26). Peptide-gated HyNaCs all cluster in subclade II (Fig. 1A), which contains only cnidarian DEG/ENaCs. Because, according to current knowledge, none of the DEG/ENaCs in the most closely related subclade I is gated by peptides (54), it is likely that peptide-gating evolved in cnidarian subclade II members. This implies that this feature evolved independently in the peptide-gated clade B members (FaNaCs and MGIC). The ligand binding sites of HyNaCs, FaNaCs and MGIC are currently unknown. Their identification will help to further clarify independent evolution of activation by peptides in these far-related DEG/ENaCs.

NeNaC1 and NeNaC24 are monophyletic with HyNaCs, making them good candidates for peptide-gated channels. Surprisingly, however, despite screening many different *Nematostella* neuropeptides, we were not able to identify a peptide that activated NeNaC1 or NeNaC24 (either expressed alone or in combination). However, the possibility that a currently unknown peptide activates these two NeNaCs remains.

Our study reveals the phylogenetic complexity of the DEG/ENaC gene family. Moreover, it shows that proton sensitivity of DEG/ENaCs has evolved independently and repeatedly in different lineages. For many DEG/ENaCs, including almost all of the NeNaCs, function and activating stimuli remain to be discovered. This functional heterogeneity is in stark contrast to the relatively high functional

conservation of other ion channel families, such as voltage-gated ion channels, in cnidarians and bilaterians (55-57). Our analysis of NeNaC2 revealed an unanticipated role for a proton-sensitive DEG/ENaC in cnidocysts discharge. We expect that the further study of DEG/ENaCs will reveal more surprising roles for these versatile channels in diverse animals.

## MATERIALS AND METHODS

### Sea anemone culture

*Nematostella* planulae, metamorphic phase individuals, juveniles and mature polyps were grown in *Nematostella* medium, composed of artificial seawater (Red Sea) at 16 ‰ in the dark at 22 °C. Anemones were fed with *Artemia salina* nauplii three times a week and the induction of gamete spawning for the mature polyps was performed as previously described (58).

### Gene identification and molecular phylogenetic analyses

ASICs and ENaCs sequences from humans were used as a query and blasted again the genome and transcriptomics datasets of *Nematostella vectensis* (59) (table S4) and in the genomes of selected species from the phylum Cnidaria (Subphylum Anthozoa and Medusozoa): *Scolanthus callimorphus* (60), *Pocillopora damicornis* (61), *Actinia tenebrosa* (62), *Amplexidiscus fenestrafer* (63), *Stylophora pistillata* (64), *Aurelia aurita* (31) and *Clytia hemisphaerica* (65). Additional DEG/ENaC sequences from representatives of different phyla were downloaded from Genbank: *Hydra magnipapillata* (Cnidaria), *Amphimedon queenslandica* (Porifera), *Trichoplax adhaerens* (Placozoa), *Caenorhabditis elegans* (Nematoda), *Drosophila melanogaster* (Arthropoda), *Platynereis dumerilii* (Annelida), *Cornu aspersum* (Mollusca), *Aplysia kurodai* (Mollusca), *Lymnaea stagnalis* (Mollusca), *Aplysia californica* (Mollusca), *Danio rerio* (Chordata) and *Homo sapiens* (Chordata). The sequences of *Acanthaster planci* (Echinodermata), *Strongylocentrotus purpuratus* (Echinodermata), *Ptichodera flava* (Hemichordata) and *Branchiostoma belcherii* (Chordata) were obtained from the dataset of (13). The sequences of *Mnemiopsis leidyi* (Ctenophora) were obtained from the dataset of (30). Amino acid sequences were aligned using MUSCLE which is included in the SEAVIEW software (66, 67). A conservative alignment strategy was employed where all the positions that were spuriously aligned were excluded (by deleting questionable sites and saving the regions of the “reduced” alignment). The first alignment contained 311 sequences, but sequences having many gaps and those that were not informative were deleted for the final alignment (23 sequences) (table S5). The final alignment contains 287 sequences with 524 amino acid sites. The maximum-likelihood phylogenetic trees were constructed using the IQ-Tree Software (68). WAG+F0+I+G4 was the best fit evolutionary model and -253005.064 was the optimal log-likelihood. Support values of the ML tree were calculated by three different methods: 1000 ultrafast bootstrap replicates (69), 1,000 replicates of the Shimodaira–Hasegawa approximate likelihood ratio test (SH-aLRT), and an approximate eBayes test (70). The molecular tree

was visualized by using the FigTree software (71). Some of the molecular clades were collapsed and the asterisks at the base of the clades in Fig. 1 represents a bootstrap support value >65% for the three different methods (fig. S1).

### **In Situ Hybridization (ISH)**

RNA in situ probes of twenty out of twenty-nine NeNaCs were generated. Forward and reverse primers were designed, and the amplicon of each NeNaC probe was amplified using the Advantage 2.0 Polymerase (Takara Bio, Japan) from cDNA of different life stages of *N. vectensis* (900-1500 bp length) (table S6). The amplicons were cloned into the pGEMT plasmid vector (Promega, USA) and then purified using the Quick Plasmid Purification Kit (Thermo Fisher Scientific, USA). Antisense probes were synthesized by in vitro transcription (MEGAScript Kit; Thermo Fisher Scientific) driven by T7 RNA polymerase with DIG incorporation (Roche, Switzerland). ISH were performed as previously described (58).

### **Cloning of selected NeNaCs and cRNA synthesis**

Of the 29 discovered NeNaCs, 19 were synthesized and cloned into pRSSP6013 vectors, a custom-made *Xenopus laevis* oocyte vector, for expression in oocytes (72). A few of these constructs were synthesized and cloned via Gene Universal (China). These cDNAs were then turned into capped cRNA, using the mMessage mMachine kit (Thermo Fisher Scientific) and SP6 RNA polymerase for linearized plasmids.

### **Electrophysiology**

Stage V-VI oocytes were collected from anesthetized *Xenopus laevis* adult females (2.5 g/liter tricainemethanesulfonate for 20–30 min). Anesthetized frogs were killed after the final oocyte harvest by decapitation. Animal care and experiments followed approved institutional guidelines at RWTH Aachen University.

About 8 ng of cRNA was injected into oocytes. Oocytes were kept in OR-2 (Oocyte Ringer Solution 2: 82.5 mM NaCl, 2.5 mM KCL, 1 mM Na<sub>2</sub>HPO<sub>4</sub>, 0.5 g/l PVP, 1 mM MgCl<sub>2</sub>, 1 mM CaCl<sub>2</sub>, 5 mM HEPES; pH adjusted to 7.3) and incubated at 19 °C for 24-72h.

We used two-electrode voltage clamp (TEVC) for recording of whole cell currents. Currents were recorded with a TurboTec 03X amplifier (npi electronic, Tamm, Germany) using an automated, pump-driven solution exchange system together with the oocyte-testing carousel controlled by the interface OTC-20 (npi electronic). We controlled data acquisition and solution exchange with both CellWorks version 5.1.1 and version 6.2.2 (npi electronic). If not indicated differently, data were acquired at -70 mV holding potential. Data were filtered at 20 Hz and acquired at 1 kHz. Experiments were performed at room temperature. Bath solution contained 140 mM NaCl, 1.8 mM CaCl<sub>2</sub>, 1.0 mM MgCl<sub>2</sub>, 10 mM

HEPES; pH was adjusted to 7.4. Acidic pH solutions were prepared the same way, except for 10 mM MES as buffer instead of HEPES (pH adjusted ranging from 6.5 to 4.0, respectively). To avoid activation of the endogenous CaCC of oocytes, some oocytes expressing NeNaC2 were additionally injected with 42 nl EGTA (20 mM).

Data was collected from oocytes of at least two different animals, if not stated otherwise. Data were analyzed and visualized with the software IgorPro (WaveMetrics, USA), Microsoft Excel 2019 (Microsoft), and Graphpad Prism 6 (Graphpad, USA). Data are presented as mean  $\pm$  S.D. in the text and as mean  $\pm$  S.E.M. on the figures, if not stated otherwise.

To determine ion selectivity, we calculated ion permeability ratio for monovalent cations  $P_{Na}/P_K$  from the shift in  $E_{rev}$  when by exchanging  $Na^+$  for  $K^+$  as the main ion in the extracellular solution, according to the following equation derived from the Goldman–Hodgkin–Katz equation:

$$\frac{P_{Na}}{P_K} = \frac{[K^+]_o}{[Na^+]_o} e^{\left(\frac{\Delta E_{rev} * F}{R * T}\right)}$$

where  $\Delta E_{rev} = E_{Na} - E_K$ .  $E_{Na}$  and  $E_K$  were determined using a linear fit between the two values in which the current reversed its sign. F is the Faraday constant, R is the gas constant, and T is temperature in kelvin. To determine  $P_{Ca}/P_{Na}$ , we used the following equation):

$$\frac{P_{Ca}}{P_{Na}} = \frac{[Na^+]_o \left(1 + e^{\left(\frac{E_{Ca} * F}{R * T}\right)}\right)}{4[Ca^{2+}]_o e^{\frac{\Delta E_{rev} * F}{R * T}}}$$

where  $\Delta E_{rev} = E_{Na} - E_{Ca^{2+}}$ .  $E_{Na}$  and  $E_{Ca^{2+}}$  were calculated same as  $E_{Na}$  and  $E_K$  above. F, R and T have the same meaning as above. The solution used to determine  $E_{Ca}$  contained (in mM): 126.5 NMDG-Cl, 10 HEPES and 10  $CaCl_2$ , adjusted to pH 7.4. The solution used to determine  $E_{Na}$  contained (in mM): 140 NaCl, 10 HEPES and 1  $CaCl_2$ , adjusted to pH 7.4. We also considered ion activity, using the Davies equation.

$$\log_{10} f_i = -0.509 z_i^2 \left( \frac{\sqrt{I}}{1 + \sqrt{I}} - 0.2I \right)$$

Where  $I$  is the ionic strength, defined as:

$$I = 0.5 \sum c_i z_i^2$$

Ionic strength was calculated for each ion in the solutions and considered in the calculations, as we found  $Ca^{2+}$  to be quite active in determining  $P_{Ca}$ .

## Prey capture and cnidocyst discharge experiments

A prey capture experiment was designed to estimate the time that it takes for starving anemones to capture three swimming artemias. Three months old anemones were selected over younger or older ages, because it is easy to observe the capture of the *Artemia* nauplii (capturing one nauplius with one of their tentacles and dragging it to their pharynx for feeding) using a stereomicroscope. Individuals starved for 3-5 d were placed in 24-well plates filled with 1.5 ml of *Nematostella* medium (pH = 7.2) at



18 °C. 45 min after placing the animals into the 24-well plate, each well was checked and only polyps that had their tentacles exposed were selected to carry out the experiment. Three live nauplii were put into each well with a glass pipette and the time that it takes for the polyp to capture them with one of its tentacles and drag it to its pharynx (the 1<sup>st</sup>, 2<sup>nd</sup> and 3<sup>rd</sup> artemia) was estimated using a stopwatch under an SMZ18 stereomicroscope (Nikon, Japan). The time (sec) that it takes for the anemones to capture three nauplii and the time between the captures (2<sup>nd</sup>-1<sup>st</sup> and 3<sup>rd</sup>-2<sup>nd</sup>) were plotted. Several aspects were considered to carry out this experiment: t<sub>0</sub> started when the three nauplii were put into each well and they were capable of swimming; if one of them after placing into the well did not swim, was inactive or sank to the bottom, the experiment was annulled; if one of them attached to the body wall of the anemone, the experiment was annulled; if the anemone contracted or hid its tentacles after placing three nauplii into the well or during the prey capture, the experiment was annulled; the time considered for capturing was when the nauplius was dragged to the pharynx after being captured with one of the tentacles. The prey capture experiment was carried out at normal conditions (pH = 7.2) as a control and in the presence of diminazene (pH = 7.2; 100 µM, Sigma-Aldrich, USA). The nauplii swam normally in the presence of diminazene under these conditions.

For the cnidocyst discharge experiment, the protocol of (46) was followed with some slight modifications: Microscope slides were coated with 25% gelatin from skin of bovine (Sigma-Aldrich). The slides were dried o/n, and the prey extract was prepared as in (46). Individuals starved for 3-5 d that were older than four months and *NvNCOL3:mOrange2* positive were selected to carry out this experiment. Discharged cnidocysts were identified under a fluorescent Eclipse NiU microscope (Nikon) by using this transgenic reporter line (73). The anemones were placed in petri dishes with *Nematostella* medium, with or without diminazene (100 µM) and at three different pH concentrations (7.2, 6.0 and 5.5). The pH adjustment of the *Nematostella* medium (before placing the anemones to the petri dishes) was accomplished by adding either HCl (1M) or NaOH (3M). The dried gelatin coated microscope slides were dipped in the prey extract and then presented to the tentacles of the anemones for 5 sec. Additional slides were also presented to the anemones without the prey extract. A cover slide was put onto the microscope slide and observed under 200× magnification of the Eclipse NiU microscope. Several pictures were taken for each replicate of the different samples and controls by using a DS-Ri2 camera mounted on the microscope and controlled by an Elements BR software (Nikon, Japan). The quantification of the discharged cnidocyst capsules was performed manually by using a tally-counter in each of the pictures taken. The area of the picture containing the discharged cnidocysts was estimated and is presented as µm<sup>2</sup>.

### **Generation and characterization of transgenic knockout null mutant line of NeNaC2**

CRISPR/Cas9 genome editing in *Nematostella* embryos was carried out using an established protocol (74). gRNAs were designed using the online web interface CRISPOR (75). One sgRNA targeting the first exon NeNaC2 were synthesized in vitro using the MEGAshortscript T7 kit (Thermo Fisher

Scientific) using the following oligos for NeNaC2: 5' TAGGCTACAATTCGCAAGGTGTTA and 5' AAATAACACCTTGCGAATTGTAG. The reaction mixture was incubated at room temperature for 10 min prior to injection into fertilized eggs. It includes the Recombinant Cas9 protein with NLS sequence (1500 ng/ $\mu$ l<sup>-1</sup>; PNA Bio, CP0120) and the sgRNA (750 ng/ $\mu$ l<sup>-1</sup>). Genomic DNA was extracted in F0 primary polyp individuals by washing the samples three times with MeOH 100% using PCR tubes. The samples were dried at 50 °C for 10 min and then a DNA extraction solution (10 mM Tris pH 8; 1mM EDTA pH 8; 25 mM NaCl and 200  $\mu$ g/ml of Proteinase K (Thermo Fisher Scientific) was added to the tubes and incubated for 2 h at 50 °C and then for 5 min at 96 °C (to inactivate the Proteinase K). Mutation analysis was carried out by using the High-Resolution Melting Curve Method (HRM) in the Magnetic Induction Cycler (MIC) qPCR (Bio Molecular Systems, Australia), for the detection of indels in the samples tested. These samples were subsequently used to amplify a PCR fragment, adjacent to the DNA region containing the mutation. Primers for HRM in NeNaC2 are: 5' ACCCTGACACTACACGGCTTTTCGGTTTG (forward) and 5' TCAGC0ATCCCTACGGCGAACAGCAGAAT (reverse) 100 bp. Primers for PCR in NeNaC2 are: 5' TACACACATCTTGGACGCTGCAATAACT (forward) and 5' TGTGACTGCGGGAACTGGATCTCTTCC (reverse) 415 bp. F0 injected animals were raised until they reached their sexual maturity (>4 months old) and then were induced to spawn gametes according to an established protocol (57). They were crossed with wild type organisms to obtain an F1 heterozygous progeny. Genomic DNA was extracted from ten individuals of the crosses of each of the tentative F0 founders. Mutation detection was carried out as with the F0 injected animals and F1 progeny carrying mutations was raised until the polyps reached sexual maturity (>4 months old). One F1 heterozygous individual was crossed with other F1 heterozygous individual having the same DNA mutation. F2 progeny from this cross were raised until they were 2 months old. These F2 individuals were placed in either 12 or 24 well plates and individually genotyped (to identify wild type, heterozygous and null homozygous). A piece of the tentacle was cut with a scalpel and the genomic DNA extraction was carried out as with F0 injected animals but instead of doing 3 washes with MeOH 100%, five were done.

For the generation of the knock-out null homozygous mutants of NeNaC2 bearing the *NvNcol3::mOrange2* reporter, one F0 NeNaC2 mutant was crossed with one polyp carrying the *NvNcol3::mOrange2* transgene. F1 organisms that were *NvNcol3::mOrange2* positive and NeNaC2 heterozygous were identified and raised until they reached sexual maturity. One F1 heterozygous NeNaC2 mutant with *NvNCOI3::mOrange2* background was crossed with another individual F1 heterozygous NeNaC2 having the same mutation. F2 progeny of this cross that were mOrange2 positive were selected and individually genotyped. The prey capture experiment (as above) was carried out for the three genetic pools of the F2 progenies (3 months old) of NeNaC2. The cnidocysts discharge experiment was carried out for the three genetic pools of the F2 progeny of NeNaC2 that were *NvNCol3::mOrange2* positive.

## Western Blotting

For NeNaC2 Western blot, we used the method as previously described in (76). In brief, custom polyclonal antibodies raised against recombinant fragment antigen generated by immunization of rabbits (GenScript, USA). The sequence of the recombinant fragment was ITGCLSLYDLKLIAAVMSCPVAQRHFETEEDKKDEDEDDRAEDPVDENPDDTITVSQMWQDF LHTLTLHGFRFVFERGPTHHHHHH. Equal amounts of protein were run on 4 – 15% Mini-PROTEAN® TGX™ Precast Protein Gel (Bio-Rad, USA) followed by blotting to a Polyvinylidene fluoride (PVDF) membrane (Bio-Rad). Membrane was incubated overnight with polyclonal antibody against NeNaC2 or monoclonal mouse anti-GAPDH (Abcam, UK) with dilution of 1:1000 at 4 °C overnight, then washed and incubated for 1 hour with peroxidase-conjugated anti-mouse or anti-rabbit antibody (Jackson ImmunoResearch, USA) with dilution of 1:10000. Detection was performed with the Clarity™ Max ECL kit (Bio-Rad) according to the manufacturer's instructions and visualized with a CCD camera of the Odyssey Fc imaging system (Li-COR Biosciences, USA).

## Statistical Analysis

Data were examined with the Prism software (Graphpad, USA) and considered significant if  $p < 0.05$ , using unpaired two-tailed Student's t-test or one-way ANOVA.

**Acknowledgments:** We thank S. Joussen for expert technical assistance.

**Funding:** German Israeli Foundation for Scientific Research & Development (GIF) grant I-1449-207.9/2018 (SG, YM).

## Author contributions:

Conceptualization: SG, YM

Methodology: JMAC

Visualization: JMAC, KF

Investigation: JMAC, KF, RA

Supervision: SG, YM

Writing – original draft: JMAC, SG, YM

Writing – review and editing: JMAC, KF, SG, YM

**Competing interests:** The authors declare that they have no competing interests.

**Data and materials availability:** All data are available in the main text or the supplementary materials.

## Additional information

Supplementary information is available for this paper.

## REFERENCES AND NOTES

1. J. Jasti, H. Furukawa, E. B. Gonzales, E. Gouaux, Structure of acid-sensing ion channel 1 at 1.9 Å resolution and low pH. *Nature*. **449**, 316-323 (2007).
2. T. Bartoi, K. Augustinowski, G. Polleichtner, S. Gründer, M. H. Ulbrich, Acid-sensing ion channel (ASIC) 1a/2a heteromers have a flexible 2:1/1:2 stoichiometry. *Proc. Natl. Acad. Sci. U.S.A.* **111**, 8281-8286 (2014).
3. Y. Ben-Shahar, Sensory functions for degenerin/epithelial sodium channels (DEG/ENaC). *Adv. Genet.* **76**, 1-26 (2011).
4. T. Lynagh, E. Flood, C. Boiteux, M. Wulf, V.V. Komnatnyy, J.M. Colding, T.W. Allen, S.A. Pless, A selectivity filter at the intracellular end of the acid-sensing ion channel pore. *eLife* **6**, e24630 (2017).
5. S. Kellenberger, L. Schild, International Union of Basic and Clinical Pharmacology. XCI. structure, function, and pharmacology of acid-sensing ion channels and the epithelial Na<sup>+</sup> channel. *Pharmacol. Rev.* **67**, 1-35 (2015).
6. B. C. Rossier, M. E. Baker, R. A. Studer, Epithelial sodium transport and its control by aldosterone: the story of our internal environment revisited. *Physiol. Rev.* **95**, 297-340 (2015).
7. R. Waldmann, G. Champigny, F. Bassilana, C. Heurteaux, M. Lazdunski, A proton-gated cation channel involved in acid-sensing. *Nature* **386**, 173-177 (1997).
8. S. Vullo, S. Kellenberger, A molecular view of the function and pharmacology of acid-sensing ion channels. *Pharmacol. Res.* **154**, 104166 (2020).
9. J. A. Wemmie, R. J. Taugher, C. J. Kreple, Acid-sensing ion channels in pain and disease. *Nat. Rev. Neurosci.* **14**, 461-471 (2013).
10. D. Wiemuth, M. Assmann, S. Grunder, The bile acid-sensitive ion channel (BASIC), the ignored cousin of ASICs and ENaC. *Channels*. **8**, 29-34 (2014).
11. S. Wiegrefe, D. Lohrer, M. Wirtz, D. Wiemuth, The bile acid-sensitive ion channel (BASIC) mediates bile acid-dependent currents in bile duct epithelial cells. *Pflügers Arch.* **473**, 1841-1850 (2021).
12. L. Wichmann, M. Althaus, Evolution of epithelial sodium channels: current concepts and hypotheses. *Am. J. Physiol. Regul. Integr. Comp. Physiol.* **319**, R387-R400 (2020).
13. T. Lynagh, Y. Mikhaleva, J. M. Colding, J. C. Glover, S. A. Pless, Acid-sensing ion channels emerged over 600 Mya and are conserved throughout the deuterostomes. *Proc. Natl. Acad. Sci. U.S.A.* **115**, 8430-8435 (2018).
14. J. Martí-Solans, A. Børve, P. Bump, A. Hejnol, T. Lynagh, Peripheral and central employment of acid-sensing ion channels during early bilaterian evolution. <https://www.biorxiv.org/content/10.1101/2022.03.17.484724v1>, (2022).

15. J. M. Latorre-Estivalis, F.C. Almeida, G. Pontes, H. Dopazo, R.B. Barrozo, M.G. Lorenzo, Evolution of the Insect PPK Gene Family. *Genome Biol. Evol.* **13**, 1-15 (2021).
16. L. Liu, W. A. Johnson, M. J. Welsh, *Drosophila* DEG/ENaC pickpocket genes are expressed in the tracheal system, where they may be involved in liquid clearance. *Proc. Natl. Acad. Sci. U.S.A.* **100**, 2128-2133 (2003).
17. J. A. Ainsley, J. M. Pettus, D. Bosenko, C. E. Gerstein, N. Zinkevich, M. G. Anderson, C. M. Adams, M. J. Welsh, W. A. Johnson, Enhanced locomotion caused by loss of the *Drosophila* DEG/ENaC protein Pickpocket1. *Curr. Biol.* **13**, 1557-1563 (2003).
18. G. Alves, J. Salle, S. Chaudy, S. Dupas, G. Maniere, High-NaCl perception in *Drosophila melanogaster*. *J. Neurosci.* **34**, 10884-10891 (2014).
19. Z. Chen, Q. Wang, Z. Wang, The amiloride-sensitive epithelial Na<sup>+</sup> channel PPK28 is essential for drosophila gustatory water reception. *J. Neurosci.* **30**, 6247-6252 (2010).
20. R. O'Hagan, M. Chalfie, M. B. Goodman, The MEC-4 DEG/ENaC channel of *Caenorhabditis elegans* touch receptor neurons transduces mechanical signals. *Nat. Neurosci.* **8**, 43-50 (2005).
21. M. B. Goodman, E. M. Schwarz, Transducing touch in *Caenorhabditis elegans*. *Annu. Rev. Physiol.* **65**, 429-452 (2003).
22. E. Lingueglia, G. Champigny, M. Lazdunski, P. Barbry, Cloning of the amiloride-sensitive FMRamide peptide-gated sodium channel. *Nature.* **378**, 730-733 (1995).
23. A. Schmidt, P. Bauknecht, E. A. Williams, K. Augustinowski, S. Gründer, G. Jékely, Dual signaling of Wamide myoinhibitory peptides through a peptide-gated channel and a GPCR in *Platynereis*. *FASEB J.* **32**, 5338-5349 (2018).
24. E. Kayal, B. Roure, H. Philippe, A. G. Collins, D. V. Lavrov, Cnidarian phylogenetic relationships as revealed by mitogenomics. *BMC Evol. Biol.* **13**, 5 (2013).
25. A. Golubovic, A. Kuhn, M. Williamson, H. Kalbacher, T.W. Holstein, C.J. P. Grimmelikhuijzen, S. Gründer, A peptide-gated ion channel from the freshwater polyp *Hydra*. *J. Biol. Chem.* **282**, 35098-35103 (2007).
26. M. Assmann, A. Kuhn, S. Dürrnagel, T. W. Holstein, S. Gründer, The comprehensive analysis of DEG/ENaC subunits in *Hydra* reveals a large variety of peptide-gated channels, potentially involved in neuromuscular transmission. *BMC Biol.* **12**, 84 (2014).
27. S. Gründer, M. Assmann, Peptide-gated ion channels and the simple nervous system of *Hydra*. *J. Exp. Biol.* **218**, 551-561 (2015).
28. S. Dürrnagel, B. H. Falkenburger, S. Gründer, High Ca (2+) permeability of a peptide-gated DEG/ENaC from *Hydra*. *J. Gen. Physiol.* **140**, 391-402 (2012).
29. L. L. Moroz, K. M. Kocot, M. R. Citarella, S. Dosung, T. P. Norekian, I. S. Povolotskaya, A. P. Grigorenko, C. Dailey, E. Berezikov, K. M. Buckley, A. Ptitsyn, D. Reshetov, K. Mukherjee, T. P. Moroz, Y. Bobkova, F. Yu, V. V. Kapitonov, J. Jurka, Y.V. Bobkov, J. J. Swore, D. O. Girardo, A. Fodor, F. Gusev, R. Sanford, R. Bruders, E. Kittler, C. E. Mills, J. P. Rast, R. Derelle, V. V. Solovyev, F. A. Kondrashov, B. J. Swalla, J. V. Sweedler, E. I. Rogaev, K.M. Halanych, A. B. Kohn, The ctenophore genome and the evolutionary origins of neural systems. *Nature.* **510**, 109-114 (2014).
30. W. Elkhatab, C. L. Smith, A. Senatore, A Na(+) leak channel cloned from *Trichoplax adhaerens* extends extracellular pH and Ca(2+) sensing for the DEG/ENaC family close to the base of Metazoa. *J. Biol. Chem.* **294**, 16320-16336 (2019).

31. K. Khalturin, C. Shinzato, M. Khalturina, M. Hamada, M. Fujie, R. Koyanagi, M. Kanda, H. Goto, F. Anton-Erxleben, M. Toyokawa, S. Toshino, N. Satoh, Medusozoan genomes inform the evolution of the jellyfish body plan. *Nat. Ecol. Evol.* **3**, 811-822 (2019).
32. A. Sebe-Pedros, B. Saudemont, E. Chomsky, F. Plessier, M. P. Mailhé, J. Renno, Y. Loe-Mie, A. Lifshitz, Z. Mukamel, S. Schmutz, S. Novault, P. H. R. Steinmetz, F. Spitz, A. Tanay, H. Marlow, Cnidarian Cell Type Diversity and Regulation Revealed by Whole-Organism Single-Cell RNA-Seq. *Cell.* **173**, 1520-1534 (2018).
33. S. Kellenberger, I. Gautschi, L. Schild, A single point mutation in the pore region of the epithelial Na<sup>+</sup> channel changes ion selectivity by modifying molecular sieving. *Proc. Natl. Acad. Sci. U.S.A.* **96**, 4170-4175 (1999).
34. I. Baconguis, C. J. Bohlen, A. Goehring, D. Julius, E. Gouaux, X-ray structure of acid-sensing ion channel 1-snake toxin complex reveals open state of a Na(+) -selective channel. *Cell.* **156**, 717-729 (2014).
35. M. Anctil, Chemical transmission in the sea anemone *Nematostella vectensis*: A genomic perspective. *Comp. Biochem. Physiol. Part D Genomics Proteomics.* **4**, 268-289 (2009).
36. E. Hayakawa, G. Menschaert, P. J. De Bock, W. Luyten, K. Gevaert, G. Baggerman, L. Schoofs, A combined strategy of neuropeptide prediction and tandem mass spectrometry identifies evolutionarily conserved ancient neuropeptides in the sea anemone *Nematostella vectensis*. *PLoS One.* **14**, e0215185 (2019).
37. T. L. Koch, C. J. P. Grimmelikhuijzen, A comparative genomics study of neuropeptide genes in the cnidarian subclasses Hexacorallia and Ceriantharia. *BMC Genom.* **21**, 666 (2020).
38. A. Baron, L. Schaefer, E. Lingueglia, G. Champigny, M. Lazdunski, Zn<sup>2+</sup> and H<sup>+</sup> are coactivators of acid-sensing ion channels. *J. Biol. Chem.* **276**, 35361-35367 (2001).
39. M. Paukert, X. Chen, G. Pollehn, H. Schindelin, S. Gründer, Candidate amino acids involved in H<sup>+</sup> gating of acid-sensing ion channel 1a. *J. Biol. Chem.* **283**, 572-581 (2008).
40. A. Springauf, S. Gründer, An acid-sensing ion channel from shark (*Squalus acanthias*) mediates transient and sustained responses to protons. *J. Physiol.* **588**, 809-820 (2010).
41. D. Wiemuth, S. Gründer, A single amino acid tunes Ca<sup>2+</sup> inhibition of brain liver intestine Na<sup>+</sup> channel (BLINaC). *J. Biol. Chem.* **285**, 30404-30410 (2010).
42. A. Karabulut, M. McClain, B. Rubinstein, S. A. McKinney, M. Gibson, The architecture and operating mechanism of a cnidarian stinging organelle. <https://www.biorxiv.org/content/10.1101/2021.09.09.459669v1>, (2021).
43. N. J. Kenny, W. R. Francis, R. E. Rivera-Vicéns, K. Juravel, A. de Mendoza, C. Díez-Vives, R. Lister, L.A. Bezares-Calderón, L. Grombacher, M. Roller, L. D. Barlow, S. Camilli, J. F. Ryan, G. Wörheide, A. L. Hill, A. Riesgo, S. P. Leys, Tracing animal genomic evolution with the chromosomal-level assembly of the freshwater sponge *Ephydatia muelleri*. *Nat. Commun.* **11**, 3676 (2020).
44. S. L. Fernandez-Valverde, A. D. Calcino, B. M. Degnan, Deep developmental transcriptome sequencing uncovers numerous new genes and enhances gene annotation in the sponge *Amphimedon queenslandica*. *BMC Genom.* **16**, 387 (2015).
45. L. A. Yañez-Guerra, D. Thiel, G. Jékely, Premetazoan Origin of Neuropeptide Signaling. *Mol. Biol. Evol.* **39**, 1-11 (2022).
46. K. Weir, C. Dupre, L. van Giesen, A. S. Lee, N. W. Bellono, A molecular filter for the cnidarian stinging response. *eLife* **9**, e57578 (2020).



47. G. U. Thorington, D. A. Hessinger, Activated L-Type Calcium Channels Inhibit Chemotactically Induced Nematocyst Discharge from Sea Anemone Tentacles. *Biol. Bull.* **238**, 180-192 (2020).
48. Y. Moran, H. H. Zakon, The evolution of the four subunits of voltage-gated calcium channels: ancient roots, increasing complexity, and multiple losses. *Genome Biol. Evol.* **6**, 2210-2217 (2014).
49. G. M. Watson, D. A. Hessinger, Evidence for calcium channels involved in regulating nematocyst discharge. *Comp. Biochem. Physiol. Comp. Physiol.* **107**, 473-481 (1994).
50. D. C. Plachetzki, C. R. Fong, T. H. Oakley, Cnidocyte discharge is regulated by light and opsin-mediated phototransduction. *BMC Biol.* **10**, 17 (2012).
51. E. Kaulich, P. T. McCubbin, W. Schafer, D. Walker, Physiological insight into the conserved properties of *Caenorhabditis elegans* acid-sensing DEG/ENaCs. <https://www.biorxiv.org/content/10.1101/2022.04.12.488049v1>, (2022).
52. Y. Wang, A. Apicella Jr, S.K. Lee, M. Ezcurra, R. D. Slone, M. Goldmit, W. R. Schafer, S. Shaham, M. Driscoll, L. Bianchi, A glial DEG/ENaC channel functions with neuronal channel DEG-1 to mediate specific sensory functions in *C. elegans*. *EMBO J.* **27**, 2388-2399 (2008).
53. N. Boiko, V. Kucher, J. D. Stockand, B. A. Eaton, Pickpocket1 is an ionotropic molecular sensory transducer. *J. Biol. Chem.* **287**, 39878-39886 (2012).
54. A. Vyvers, A. Schmidt, D. Wiemuth, S. Gründer, Screening of 109 neuropeptides on ASICs reveals no direct agonists and dynorphin A, YFMRFamide and endomorphin-1 as modulators. *Sci. Rep.* **8**, 18000 (2018).
55. Y. Moran, M. G. Barzilai, B. J. Liebeskind, H. H. Zakon, Evolution of voltage-gated ion channels at the emergence of Metazoa. *J. Exp. Biol.* **218**, 515-525 (2015).
56. E. Fux, A. Mehta, J. Moffat, J. D. Spafford, Eukaryotic Voltage-Gated Sodium Channels: On Their Origins, Asymmetries, Losses, Diversification and Adaptations. *Front. Physiol.* **9**, 1406 (2018).
57. B. S. Zhorov, Possible Mechanism of Ion Selectivity in Eukaryotic Voltage-Gated Sodium Channels. *J. Phys. Chem. B.* **125**, 2074-2088 (2021).
58. G. Genikhovich, U. Technau, In situ hybridization of starlet sea anemone (*Nematostella vectensis*) embryos, larvae, and polyps. *Cold Spring Harb. Protoc.* **2009**, prot5282 (2009).
59. N. H. Putnam, M. Srivastava, U. Hellsten, B. Dirks, J. Chapman, A. Salamov, A. Terry, H. Shapiro, E. Lindquist, V.V. Kapitonov, J. Jurka, G. Genikhovich, I. V. Grigoriev, S. M. Lucas, R. E. Steele, J.R. Finnerty, U. Technau, M. Q. Martindale, D. S. Rokhsar, Sea anemone genome reveals ancestral eumetazoan gene repertoire and genomic organization. *Science*. **317**, 86-94 (2007).
60. B. Zimmermann, S. M. C. Robb, G. Genikhovich, W. J. Fropf, L. Weilguny, S. He, S. Chen, J. Lovegrove-Walsh, E. M. Hill, C. Y. Chen, K. Ragkousi, D. Praher, D. Fredman, Y. Moran, M. C. Gibson, U. Technau, Sea anemone genomes reveal ancestral metazoan chromosomal macrosynteny. <https://www.biorxiv.org/content/10.1101/2020.10.30.359448v2>, (2020).
61. R. Cuning, R. A. Bay, P. Gillette, A. C. Baker, N. Traylor-Knowles, Comparative analysis of the *Pocillopora damicornis* genome highlights role of immune system in coral evolution. *Sci. Rep.* **8**, 16134 (2018).
62. J. M. Surm, Z. K. Stewart, A. Papanicolaou, A. Pavasovic, P. J. Prentis, The draft genome of *Actinia tenebrosa* reveals insights into toxin evolution. *Ecol. Evol.* **9**, 11314-11328 (2019).

63. X. Wang, Y. J. Liew, Y. Li, D. Zoccola, S. Tambutte, M. Aranda, Draft genomes of the corallimorpharians *Amplexidiscus fenestrafer* and *Discosoma* sp. *Mol. Ecol. Resour.* **17**, e187-e195 (2017).
64. C. R. Voolstra, Y. Li, Y. J. Liew, S. Baumgarten, D. Zoccola, J. F. Flot, S. Tambutté, D. Allemand, M. Aranda, Comparative analysis of the genomes of *Stylophora pistillata* and *Acropora digitifera* provides evidence for extensive differences between species of corals. *Sci. Rep.* **7**, 17583 (2017).
65. L. Leclere, C. Horin, S. Chevalier, P. Lapébie, P. Dru, S. Peron, M. Jager, T. Condamine, K. Pottin, S. Romano, J. Steger, C. Sinigaglia, C. Barreau, G. Q. Artigas, A. Ruggiero, C. Fourrage, J. E. M. Kraus, J. Poulain, J. M. Aury, P. Wincker, E. Quéinnec, U. Technau, M. Manuel, T. Momose, E. Houlston, R. R. Copley, The genome of the jellyfish *Clytia hemisphaerica* and the evolution of the cnidarian life-cycle. *Nat. Ecol. Evol.* **3**, 801-810 (2019).
66. R. C. Edgar, MUSCLE: a multiple sequence alignment method with reduced time and space complexity. *BMC Bioinform.* **5**, 113 (2004).
67. M. Gouy, S. Guindon, O. Gascuel, SeaView version 4: A multiplatform graphical user interface for sequence alignment and phylogenetic tree building. *Mol. Biol. Evol.* **27**, 221-224 (2010).
68. M.A.T. Nguyen, H. A. Schmidt, A. von Haeseler, B. Q. Minh, IQ-TREE: A Fast and Effective Stochastic Algorithm for Estimating Maximum-Likelihood Phylogenies. *Mol. Biol. Evol.* **32**, 268-274 (2014).
69. B. Q. Minh, M. A. T. Nguyen, A. von Haeseler, Ultrafast Approximation for Phylogenetic Bootstrap. *Mol. Biol. Evol.* **30**, 1188-1195 (2013).
70. M. Anisimova, M. Gil, J. F. Dufayard, C. Dessimoz, O. Gascuel, Survey of branch support methods demonstrates accuracy, power, and robustness of fast likelihood-based approximation schemes. *Syst. Biol.* **60**, 685-699 (2011).
71. A. Rambaut, FigTree v1. 3.1. <http://tree.bio.ed.ac.uk/software/figtree/>, (2009).
72. E. L. Bäessler, T. J. Ngo-Anh, H. S. Geisler, J. P. Ruppersberg, S. Gründer, Molecular and functional characterization of acid-sensing ion channel (ASIC) 1b. *J. Biol. Chem.* **276**, 33782-33787 (2001).
73. K. Sunagar, Y. Y. Columbus-Shenkar, A. Fridrich, N. Gutkovich, R. Aharoni, Y. Moran, Cell type-specific expression profiling unravels the development and evolution of stinging cells in sea anemone. *BMC Biol.* **16**, 108 (2018).
74. A. Ikmi, S. A. McKinney, K. M. Delventhal, M. C. Gibson, TALEN and CRISPR/Cas9-mediated genome editing in the early-branching metazoan *Nematostella vectensis*. *Nat. Commun.* **5**, 5486 (2014).
75. J.P. Concordet, M. Haeussler, CRISPOR: intuitive guide selection for CRISPR/Cas9 genome editing experiments and screens. *Nucleic Acids Res.* **46**, W242-W245 (2018).
76. M. Lewandowska, T. Sharoni, Y. Admoni, R. Aharoni, Y. Moran, Functional Characterization of the Cnidarian Antiviral Immune Response Reveals Ancestral Complexity. *Mol. Biol. Evol.* **38**, 4546-4561 (2021).

# Figures and figure legends

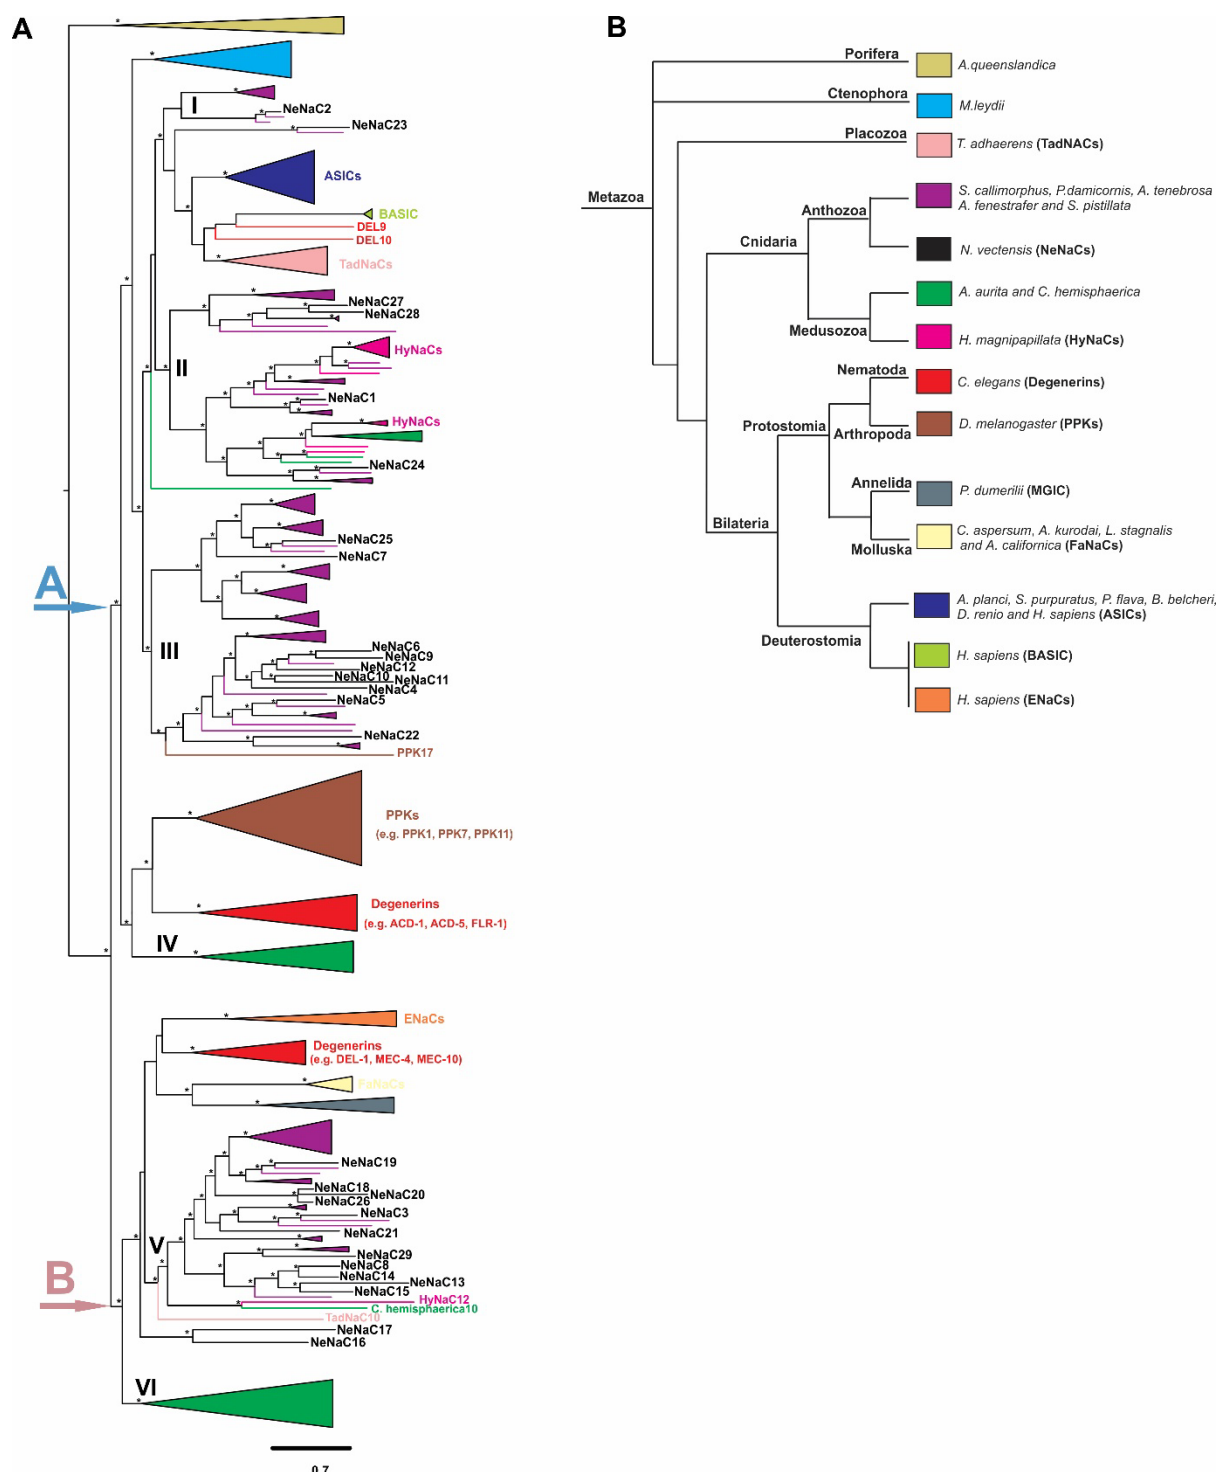

**Figure 1. Molecular phylogenetic tree of the DEG/ENaC channel superfamily. (A)** The tree was constructed with the IQ-Tree software (see Materials and Methods). The branches of some clades are collapsed Asterisk denotes a bootstrap support value > 65% for the three different methods. **(B)** Schematic representation of the molecular position of the main groups of selected species for the identification of their DEG/ENaC Channels.

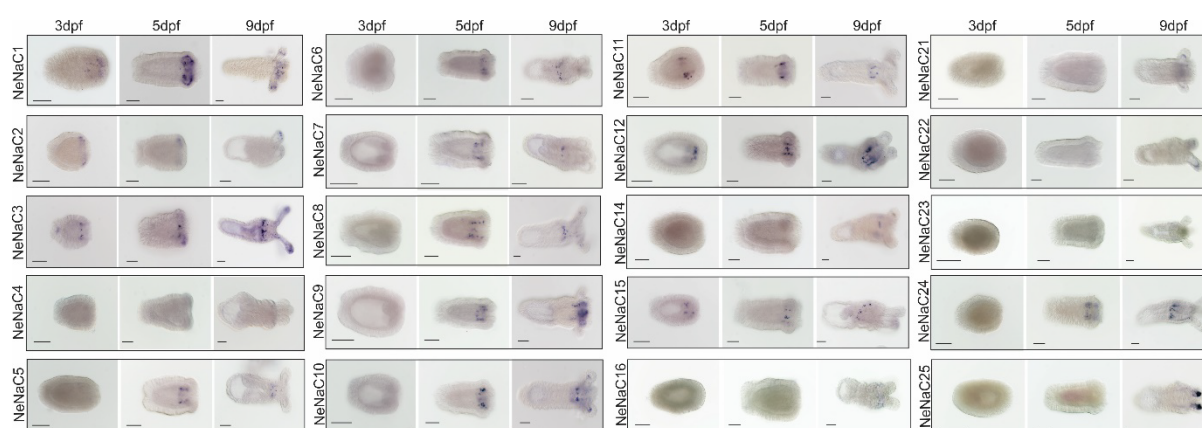

**Figure 2. In situ Hybridization of selected NeNaCs at three different developmental stages in *N. vectensis*.** The expression is noticeable by the blue stain (NBT/BCIP crystals). Oral end of the animals is to the right for each panel. Scale bars: 100  $\mu$ m.

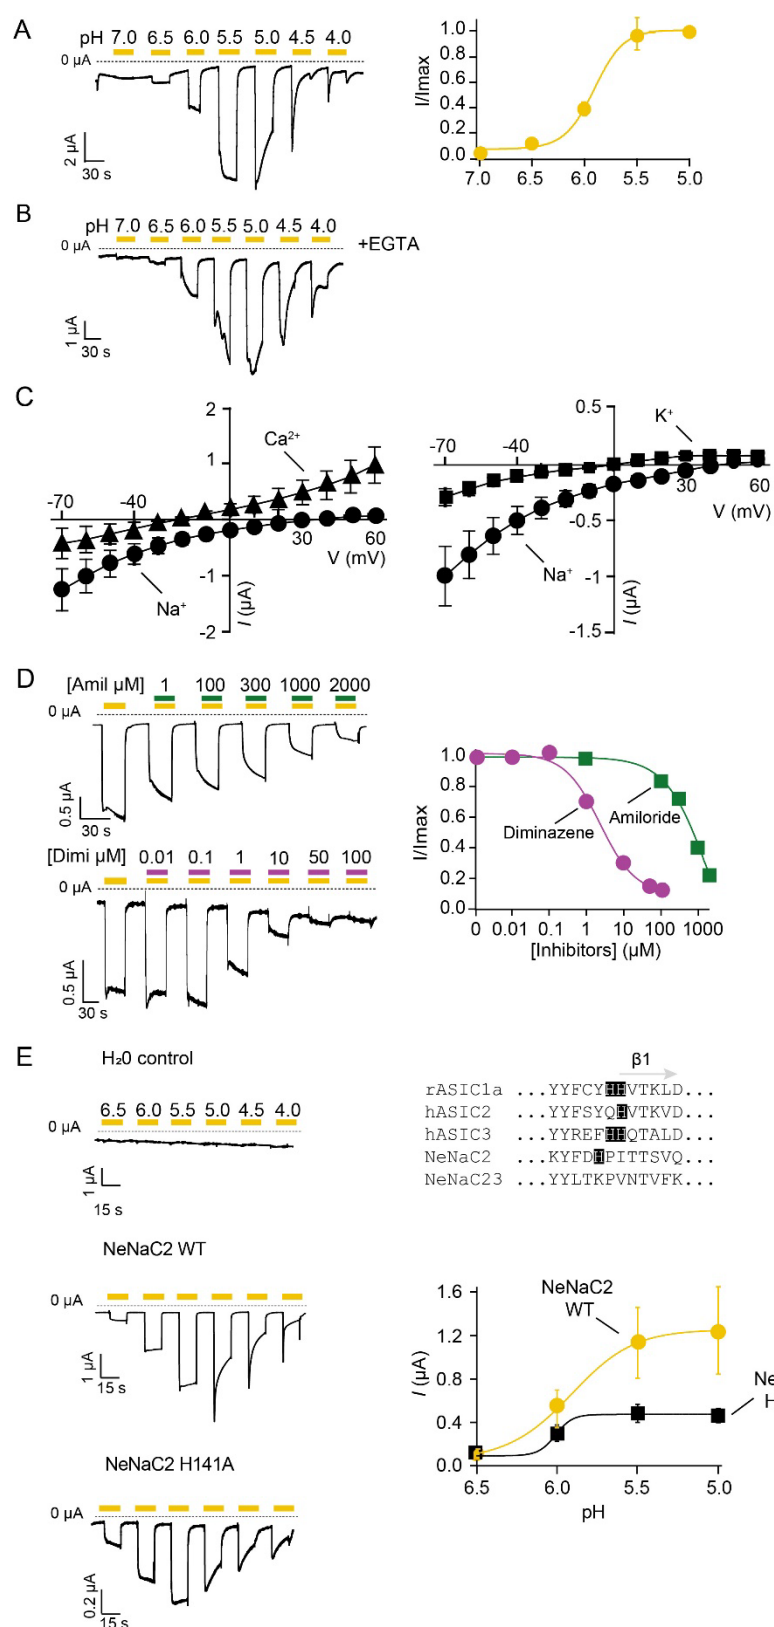

**Figure 3. NeNaC2 is a proton-gated ion channel.** (A) *Left*. Representative trace of NeNaC2 currents elicited by increasingly more acidic pH (yellow bars). Note the biphasic current that appeared below pH 6.0. *Right*. Concentration-response curve (n=9). (B) Representative trace from NeNaC2-expressing

oocytes injected with EGTA (black bars). **(C)** Left, I/V plot revealing  $E_{rev}$  for  $Na^+$  (black circles) and  $Ca^{2+}$  (black triangles). Right, I/V plot revealing  $E_{rev}$  for  $Na^+$  (black circles) and  $K^+$  (black circles). *Error bars* represent S.D. **(D)** *Left*. Representative current traces of NeNaC2 in the presence of increasing concentrations of amiloride or diminazene (green and turquoise bars, concentrations in  $\mu M$ ); NeNaC2 was activated with pH 6.0. *Right*. Concentration-response curves. *Error bars* represent S.D. **(E)** *Left*. Representative current traces of NeNaC2 wt, NeNaC2H141A, and of water-injected control oocytes. *Right. Top*, alignment of the region close to  $\beta 1$  of rASIC1a, hASIC2, hASIC3, NeNaC2 and NeNaC23. *Bottom*, mean current amplitudes of NeNaC2 (yellow dots,  $n = 8$ ) and NeNaC2H141A (black squares,  $n = 6$ ). Current amplitudes were reduced for the mutant, but apparent proton affinity was similar. *Error bars* represent S.E. Concentration-response curves were fitted with the *Hill* equation.



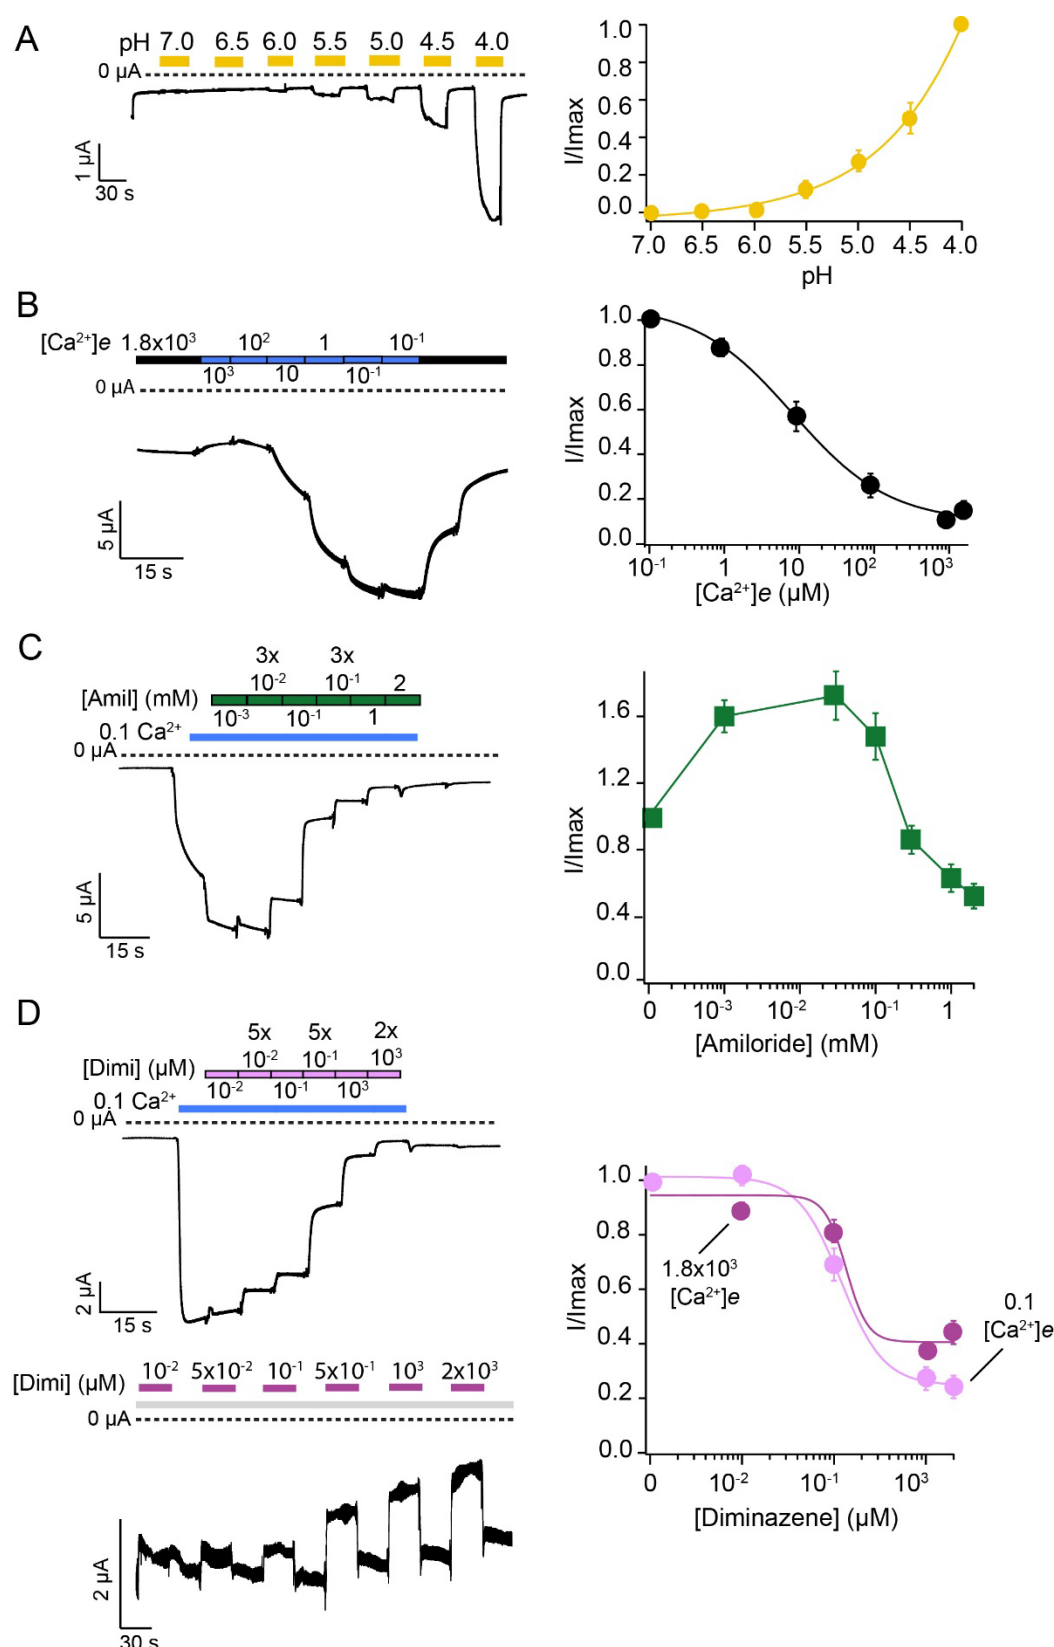

**Figure 4. NeNaC14 is sensitive to high proton concentrations and NeNaC8 is inhibited by extracellular  $Ca^{2+}$ .** (A) *Left*, representative current trace of NeNaC14 being activated by increasingly more acidic pH levels (yellow bars). *Right*, pH-response curve. (B) *Left*, representative current trace showing opening of NeNaC8 by lowering  $[Ca^{2+}]_e$ .  $[Ca^{2+}]_e$  is indicated in  $\mu$ M. *Right*, Concentration-

response curve.  $n = 15$ . **(C)** *Left*, representative current trace showing inhibition of NeNaC8 by amiloride; NeNaC8 was opened by reducing  $[Ca^{2+}]_e$  to 100 nM (blue line). *Right*, Concentration-response curve.  $n = 11$ . **(D)** *Left*, representative current traces showing inhibition of NeNaC8 by diminazene. Diminazene was dissolved in bath solution containing either 100 nM  $Ca^{2+}$  (top, light pink bars) or 1.8 mM  $Ca^{2+}$  (bottom, dark pink bars). *Right*, concentration-response curves.  $n = 14$ . *Error bars* represent S.E.M.; Concentration-response curves in a), b), and d) were fitted with the *Hill* equation.

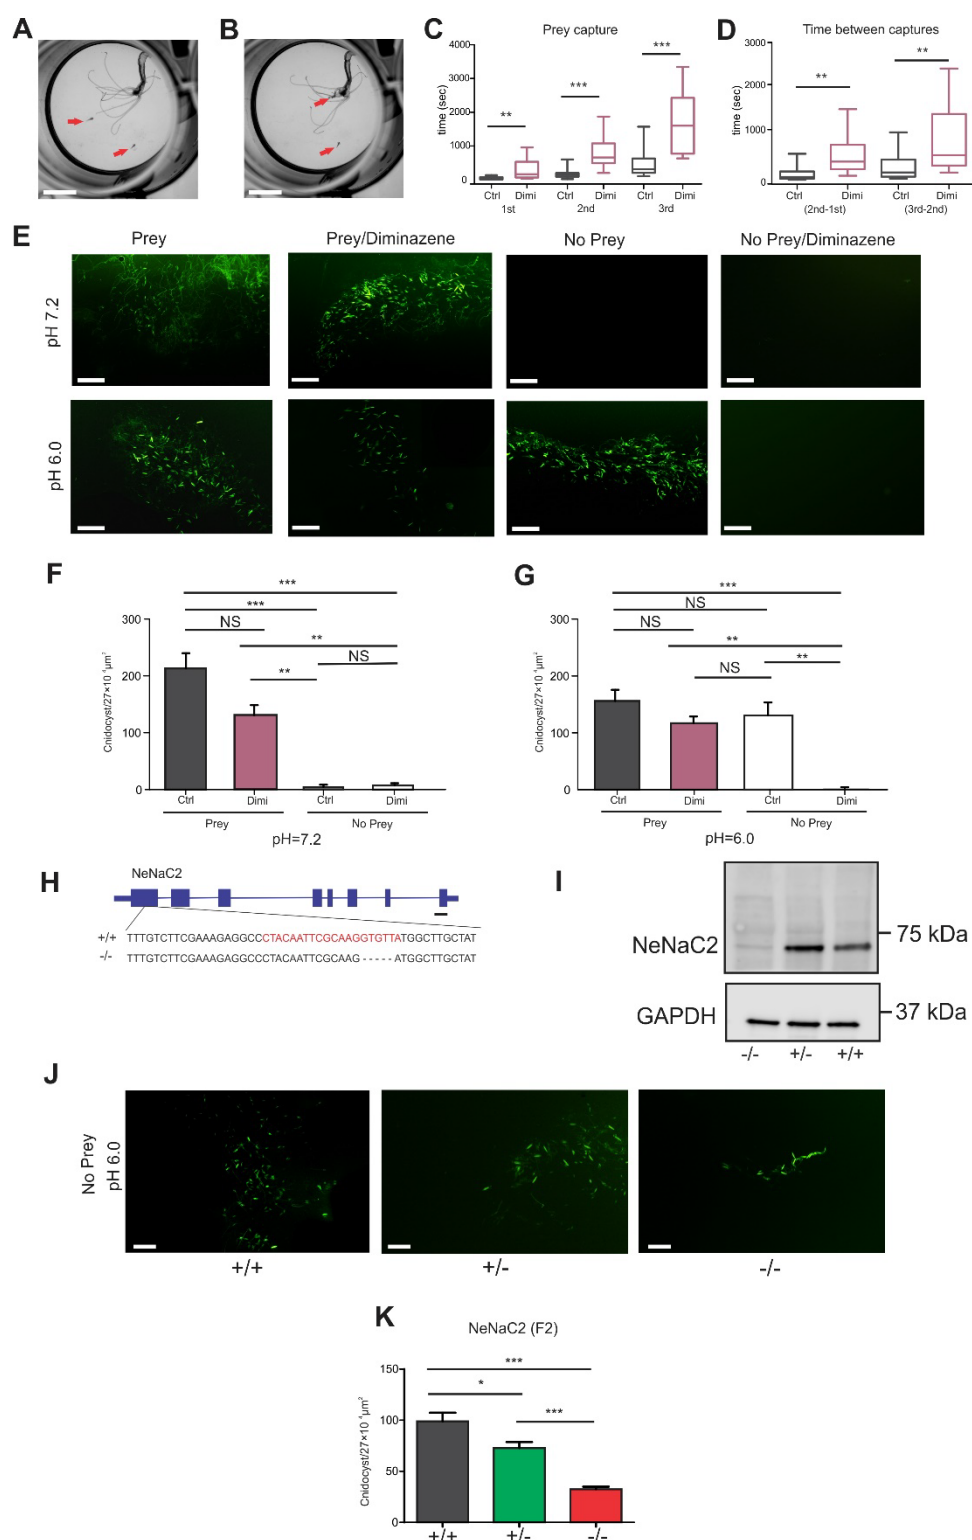

**Figure 5. Diminazene inhibits the time of capturing artemia nauplii at pH 7.2 and nematocyst discharge at acidic pH.** (A) One 3-months-old anemone in a well, ready to capture two swimming *Artemia* nauplii (red arrows). (B) the *Nematostella* polyp captured one of the nauplii with one of its tentacles and drags it to its pharynx. (C) Box plot with whiskers showing the time in seconds in which polyps capture the first, second and third nauplius in the absence and in the presence of diminazene (100  $\mu$ M). (D) Box plot with whiskers showing the differences in time between the capture of the second

and the first, and the third and the second nauplius in the absence and in the presence of diminazene (100  $\mu$ M). **(E)** Pictures of discharged cnidocysts of *NvNcol3::mOrange2* positive organisms at two pH values (7.2 and 6.0), with and without prey extract and with and without diminazene. **(F)** Bar graph showing the number of discharged cnidocysts (mean  $\pm$  S.E.) at pH 7.2 with and without prey extract and with and without diminazene. **(G)** Bar graph showing the number of discharged cnidocysts (mean  $\pm$  S.E.) at pH 6.0 with and without prey extract and with and without diminazene. **(H)** Gene model of NeNaC2 showing exons and introns; DNA sequences at the bottom show the sequence of the WT and the mutant; the mutant shows a deletion of five nucleotides. The gene region that the sgRNA targeted is indicated in red. **(I)** Western Blot from NeNaC2 F2 individuals of the three genetic pools showing that the protein was not expressed in NeNaC2<sup>(-/-)</sup> animals; GAPDH was used as a control. **(J)** Pictures of discharged cnidocysts of the F2 progeny at pH 6.0 and without prey extract from the three genetic pools that were *NvNcol3::mOrange2* positive. **(K)** Bar graph showing the number of discharged cnidocysts (mean  $\pm$  S.E.) of the F2 progeny from NeNaC2 of the three genetic pools at pH 6.0 and without prey extract. Unpaired student's t-test student from 15 individuals in each treatment for data of **(C)** and **(D)**. One-way ANOVA of eight organisms per treatment with Bonferroni post-hoc multiple comparisons test for data of **(F)** and **(G)**. One-way ANOVA from eight individuals per treatment with Tukey post-hoc multiple comparisons test for **(K)**. NS, no significant differences, \*,  $\leq 0.01$ ; \*\*,  $\leq 0.001$ , \*\*\*,  $\leq 0.0001$ . Scale bars: **(A)**, **(B)** 1 mm; **(E)** 100  $\mu$ m; **(H)** 100 bp; **(J)** 100  $\mu$ m.
